# Supplementary material
Source: Copernicus journal article supplement (doi:10.5194/se-17-601-2026)
Supplement: Supplementary file 1 [file se-17-601-2026-supplement.pdf]

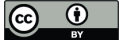

*Supplement of*

**High-pressure behaviour and elastic constants of  $1M$  and  $2M_1$  polytypes of phlogopite  $\text{KMg}_3\text{Si}_3\text{AlO}_{10}(\text{OH})_2$**

**Gianfranco Ulian et al.**

*Correspondence to:* Giovanni Valdrè ([giovanni.valdre@unibo.it](mailto:giovanni.valdre@unibo.it))

The copyright of individual parts of the supplement might differ from the article licence.

**Table S1. Revised DFT-D2 parameters according to the B3LYP-D\* correction scheme.**

| <b>Element</b> | <b><math>C_6</math></b> | <b><math>R_{vdW}</math></b> |
|----------------|-------------------------|-----------------------------|
| K              | 10.80*                  | 1.55925                     |
| Si             | 9.23*                   | 1.8018                      |
| Al             | 10.79*                  | 1.8018                      |
| Mg             | 5.71*                   | 1.4322                      |
| O              | 0.70*                   | 1.4091                      |
| H              | 0.14*                   | 1.3013                      |

Values marked with an asterisk (\*) are related to the original DFT-D2 parametrization proposed by Grimme (2006).

**Table S2. Crystal structure parameters of Phlogopite-1M as a function of pressure, obtained from DFT/B3LYP-D\* simulations.**

|                         |      | Pressure (GPa) |         |         |         |         |         |         |         |         |         |         |         |
|-------------------------|------|----------------|---------|---------|---------|---------|---------|---------|---------|---------|---------|---------|---------|
|                         |      | 17.36          | 13.05   | 9.51    | 6.59    | 4.20    | 2.24    | 0.63    | 0.05    | 0.00    | -0.68   | -1.76   | -2.65   |
| $a$ (Å)                 |      | 5.1354         | 5.1645  | 5.1927  | 5.2198  | 5.2453  | 5.2688  | 5.2902  | 5.2984  | 5.2990  | 5.3094  | 5.3270  | 5.3430  |
| $b$ (Å)                 |      | 8.8992         | 8.9542  | 9.0065  | 9.0557  | 9.1013  | 9.1428  | 9.1801  | 9.1944  | 9.1954  | 9.2134  | 9.2441  | 9.2728  |
| $c$ (Å)                 |      | 9.3775         | 9.4901  | 9.6061  | 9.7284  | 9.8579  | 9.9960  | 10.1438 | 10.2081 | 10.2086 | 10.3010 | 10.4689 | 10.6562 |
| $\beta$ (°)             |      | 100.91         | 100.81  | 100.69  | 100.58  | 100.48  | 100.38  | 100.27  | 100.24  | 100.228 | 100.20  | 100.26  | 100.70  |
| $V$ (Å <sup>3</sup> )   |      | 420.811        | 431.073 | 441.460 | 452.032 | 462.754 | 473.654 | 484.733 | 489.380 | 489.52  | 495.944 | 507.271 | 518.779 |
| $T_{\text{thick}}$ (Å)  |      | 2.2068         | 2.2151  | 2.2222  | 2.2294  | 2.2363  | 2.2424  | 2.2484  | 2.2506  | 2.2708  | 2.2537  | 2.2584  | 2.2631  |
| $M_{\text{thick}}$ (Å)  |      | 2.1326         | 2.1427  | 2.1515  | 2.1590  | 2.1655  | 2.1717  | 2.1762  | 2.1786  | 2.1781  | 2.1804  | 2.1839  | 2.1856  |
| $I_{\text{thick}}$ (Å)  |      | 2.6787         | 2.7522  | 2.8343  | 2.9247  | 3.0254  | 3.1378  | 3.2625  | 3.3175  | 3.3267  | 3.3986  | 3.5434  | 3.6978  |
| $\psi$ (°)              |      | 58.08          | 58.13   | 58.19   | 58.25   | 58.30   | 58.35   | 58.40   | 58.41   | 58.38   | 58.44   | 58.48   | 58.54   |
| $\alpha_r$ (°)          |      | 14.58          | 14.11   | 13.53   | 12.90   | 12.26   | 11.62   | 11.03   | 10.78   | 10.65   | 10.45   | 9.80    | 8.98    |
| $\Delta z$ (Å)          |      | 0.0063         | 0.0081  | 0.0094  | 0.0102  | 0.0102  | 0.0105  | 0.0106  | 0.0107  | 0.0106  | 0.0105  | 0.0105  | 0.0106  |
| TQE                     |      |                |         |         |         |         |         |         |         |         |         |         |         |
|                         | T1   | 1.0016         | 1.0015  | 1.0014  | 1.0014  | 1.0014  | 1.0014  | 1.0015  | 1.0015  | 1.0015  | 1.0016  | 1.0017  | 1.0019  |
|                         | T2   | 1.0025         | 1.0023  | 1.0021  | 1.0020  | 1.0019  | 1.0018  | 1.0016  | 1.0016  | 1.0016  | 1.0015  | 1.0014  | 1.0014  |
|                         | T3   | 1.0032         | 1.0029  | 1.0027  | 1.0024  | 1.0022  | 1.0021  | 1.0019  | 1.0019  | 1.0019  | 1.0018  | 1.0017  | 1.0015  |
|                         | T4   | 1.0020         | 1.0018  | 1.0017  | 1.0016  | 1.0014  | 1.0014  | 1.0013  | 1.0013  | 1.0013  | 1.0013  | 1.0014  | 1.0017  |
|                         | mean | 1.0023         | 1.0021  | 1.0020  | 1.0019  | 1.0017  | 1.0017  | 1.0016  | 1.0016  | 1.0016  | 1.0016  | 1.0016  | 1.0016  |
| $V_T$ (Å <sup>3</sup> ) |      |                |         |         |         |         |         |         |         |         |         |         |         |
|                         | T1   | 2.1664         | 2.1834  | 2.1991  | 2.2122  | 2.2252  | 2.2355  | 2.2461  | 2.2494  | 2.2486  | 2.2536  | 2.2599  | 2.2655  |
|                         | T2   | 2.1456         | 2.1679  | 2.1860  | 2.2044  | 2.2211  | 2.2347  | 2.2470  | 2.2524  | 2.2523  | 2.2591  | 2.2683  | 2.2731  |
|                         | T3   | 2.1530         | 2.1762  | 2.1971  | 2.2158  | 2.2328  | 2.2470  | 2.2620  | 2.2670  | 2.2667  | 2.2739  | 2.2838  | 2.2903  |
|                         | T4   | 2.6166         | 2.6466  | 2.6712  | 2.6948  | 2.7145  | 2.7351  | 2.7508  | 2.7563  | 2.7568  | 2.7649  | 2.7764  | 2.7861  |
|                         | mean | 2.2704         | 2.2935  | 2.3134  | 2.3318  | 2.3484  | 2.3631  | 2.3765  | 2.3813  | 2.3811  | 2.3879  | 2.3971  | 2.4038  |
| TAV                     |      |                |         |         |         |         |         |         |         |         |         |         |         |
|                         | T1   | 6.6733         | 6.2242  | 5.8474  | 5.6930  | 5.6465  | 5.6884  | 5.8077  | 5.9691  | 5.9360  | 6.1760  | 6.8520  | 7.7975  |
|                         | T2   | 10.9318        | 9.8765  | 9.2129  | 8.6174  | 8.0949  | 7.6844  | 7.0516  | 6.8177  | 6.8307  | 6.5159  | 6.0623  | 5.7233  |
|                         | T3   | 13.8184        | 12.3888 | 11.4494 | 10.4006 | 9.5281  | 8.9059  | 8.1187  | 7.9092  | 7.9105  | 7.5711  | 6.8496  | 6.3742  |
|                         | T4   | 7.0267         | 6.5342  | 6.1014  | 5.6988  | 5.2548  | 5.0137  | 4.9102  | 4.9493  | 4.9081  | 5.0012  | 5.6500  | 6.8758  |
|                         | mean | 9.6126         | 8.7559  | 8.1528  | 7.6025  | 7.1311  | 6.8231  | 6.4721  | 6.4113  | 6.2990  | 6.3161  | 6.3535  | 6.6927  |
| OQE                     |      |                |         |         |         |         |         |         |         |         |         |         |         |
|                         | M1   | 1.0064         | 1.0064  | 1.0065  | 1.0067  | 1.0069  | 1.0072  | 1.0074  | 1.0075  | 1.0076  | 1.0077  | 1.0079  | 1.0081  |
|                         | M2   | 1.0076         | 1.0080  | 1.0084  | 1.0088  | 1.0092  | 1.0096  | 1.0099  | 1.0100  | 1.0100  | 1.0101  | 1.0102  | 1.0103  |
|                         | M3   | 1.0075         | 1.0071  | 1.0070  | 1.0069  | 1.0069  | 1.0069  | 1.0070  | 1.0070  | 1.0071  | 1.0071  | 1.0073  | 1.0076  |
|                         | M4   | 1.0102         | 1.0104  | 1.0107  | 1.0110  | 1.0114  | 1.0117  | 1.0122  | 1.0122  | 1.0123  | 1.0125  | 1.0127  | 1.0131  |
|                         | M5   | 1.0084         | 1.0080  | 1.0079  | 1.0079  | 1.0080  | 1.0082  | 1.0083  | 1.0084  | 1.0085  | 1.0086  | 1.0089  | 1.0093  |
|                         | M6   | 1.0080         | 1.0085  | 1.0090  | 1.0096  | 1.0102  | 1.0108  | 1.0114  | 1.0116  | 1.0116  | 1.0118  | 1.0122  | 1.0124  |
|                         | mean | 1.0080         | 1.0081  | 1.0083  | 1.0085  | 1.0088  | 1.0091  | 1.0094  | 1.0095  | 1.0095  | 1.0096  | 1.0099  | 1.0101  |
| $V_O$ (Å <sup>3</sup> ) |      |                |         |         |         |         |         |         |         |         |         |         |         |
|                         | M1   | 10.7509        | 10.9359 | 11.1129 | 11.2778 | 11.4246 | 11.5666 | 11.6952 | 11.7421 | 11.7415 | 11.8035 | 11.9045 | 11.9997 |
|                         | M2   | 10.9900        | 11.1461 | 11.3042 | 11.4473 | 11.5924 | 11.7219 | 11.8339 | 11.8795 | 11.8843 | 11.9433 | 12.0380 | 12.1191 |
|                         | M3   | 10.7533        | 10.9516 | 11.1337 | 11.3044 | 11.4574 | 11.6025 | 11.7246 | 11.7787 | 11.7733 | 11.8314 | 11.9325 | 12.0095 |
|                         | M4   | 10.8552        | 11.0367 | 11.2085 | 11.3717 | 11.5251 | 11.6603 | 11.7833 | 11.8353 | 11.8359 | 11.9006 | 11.9984 | 12.0834 |
|                         | M5   | 10.7069        | 10.9026 | 11.0826 | 11.2519 | 11.4020 | 11.5451 | 11.6623 | 11.7085 | 11.7095 | 11.7628 | 11.8586 | 11.9329 |

|     |      |         |         |         |         |         |         |         |         |                |         |         |         |
|-----|------|---------|---------|---------|---------|---------|---------|---------|---------|----------------|---------|---------|---------|
|     | M6   | 10.9158 | 11.0835 | 11.2357 | 11.3767 | 11.5123 | 11.6385 | 11.7513 | 11.8011 | <i>11.8011</i> | 11.8573 | 11.9551 | 12.0390 |
|     | mean | 10.8287 | 11.0094 | 11.1796 | 11.3383 | 11.4856 | 11.6225 | 11.7418 | 11.7909 | <i>11.7909</i> | 11.8498 | 11.9479 | 12.0306 |
| OAV | M1   | 21.7980 | 21.6368 | 21.8126 | 22.3380 | 22.9983 | 23.6038 | 24.1663 | 24.3780 | <i>24.4726</i> | 24.7741 | 25.3148 | 25.9644 |
|     | M2   | 21.1952 | 22.4931 | 24.0685 | 25.6111 | 27.1508 | 28.4713 | 29.7099 | 29.9842 | <i>30.0417</i> | 30.4588 | 31.0207 | 31.4415 |
|     | M3   | 24.8686 | 23.6203 | 22.8323 | 22.4067 | 22.2294 | 22.1414 | 22.3105 | 22.4842 | <i>22.5378</i> | 22.7713 | 23.3354 | 24.4020 |
|     | M4   | 33.5517 | 34.1569 | 35.1030 | 36.0813 | 37.0088 | 37.8034 | 38.9527 | 39.6922 | <i>39.2130</i> | 40.2746 | 41.4229 | 39.0787 |
|     | M5   | 27.8809 | 26.6329 | 26.0204 | 25.9347 | 26.1626 | 26.4992 | 27.0459 | 27.1920 | <i>27.4432</i> | 27.8677 | 28.8367 | 30.1875 |
|     | M6   | 26.1541 | 27.9356 | 29.6783 | 31.5629 | 33.4526 | 35.2194 | 36.8132 | 37.2858 | <i>37.3434</i> | 37.9419 | 38.8434 | 39.2735 |
|     | mean | 25.9081 | 26.0793 | 26.5859 | 27.3225 | 28.1671 | 28.9564 | 29.8331 | 30.1694 | <i>29.5506</i> | 30.6814 | 31.4623 | 31.7246 |

15  $T_{\text{thick}}$ ,  $M_{\text{thick}}$ , and  $I_{\text{thick}}$  are tetrahedral sheet thickness (calculated from the  $z$  coordinates of the basal and apical oxygen atoms), the octahedral sheet thickness (calculated from the  $z$  coordinates of the apical and hydroxyl O atoms) and interlayer thickness (calculated from the  $z$  coordinates of the basal oxygen atoms), respectively.  $\psi$  and  $\alpha$  are the octahedral flattening angle and the tetrahedral rotation angle, respectively (Donnay et al., 1964a, b; Hazen and Burnham, 1973).  $\Delta z$  is the departure from coplanarity of the basal oxygen atoms O(b) (Güven, 1971). TQE and OQE are the tetrahedral and octahedral quadratic elongations, respectively, whereas TAV and OAV are the tetrahedral and octahedral bond angle variance, respectively (Robinson et al., 1971).  $V_T$  and  $V_O$  are the volumes of tetrahedra and octahedra, respectively. T and M represent the generic tetrahedral and octahedral sites, respectively. The results of the equilibrium geometry (0 GPa), related to the work of Ulian and Valdrè (2023b), were reported in italic font.

20

**Table S3. Crystal structure parameters of Phlogopite-2M<sub>1</sub> as a function of pressure, obtained from DFT/B3LYP-D\* simulations.**

|                         | Pressure (GPa) |         |         |         |         |         |         |         |         |          |          |          |
|-------------------------|----------------|---------|---------|---------|---------|---------|---------|---------|---------|----------|----------|----------|
|                         | 13.66          | 9.96    | 6.94    | 4.46    | 2.45    | 0.80    | 0.05    | 0.00    | -0.54   | -1.62    | -2.52    | -3.25    |
| $a$ (Å)                 | 5.1631         | 5.1919  | 5.2186  | 5.2436  | 5.2667  | 5.2878  | 5.2984  | 5.2977  | 5.3069  | 5.3244   | 5.3408   | 5.3552   |
| $b$ (Å)                 | 8.9453         | 8.9962  | 9.0452  | 9.0911  | 9.1335  | 9.1719  | 9.1910  | 9.1918  | 9.2065  | 9.2385   | 9.2682   | 9.2959   |
| $c$ (Å)                 | 18.706         | 18.935  | 19.178  | 19.433  | 19.704  | 19.993  | 20.156  | 20.1591 | 20.297  | 20.612   | 20.931   | 21.256   |
| $\beta$ (°)             | 94.90          | 94.87   | 94.85   | 94.82   | 94.79   | 94.75   | 94.72   | 94.732  | 94.69   | 94.55    | 94.11    | 93.29    |
| $V$ (Å <sup>3</sup> )   | 860.778        | 881.229 | 902.014 | 923.107 | 944.528 | 966.294 | 978.198 | 978.30  | 988.361 | 1010.709 | 1033.407 | 1056.412 |
| $T_{\text{thick}}$ (Å)  | 2.2158         | 2.2230  | 2.2300  | 2.2369  | 2.2424  | 2.2484  | 2.2506  | 2.2722  | 2.2530  | 2.2578   | 2.2629   | 2.2671   |
| $M_{\text{thick}}$ (Å)  | 2.1402         | 2.1502  | 2.1587  | 2.1650  | 2.1717  | 2.1757  | 2.1788  | 2.1783  | 2.1800  | 2.1835   | 2.1858   | 2.1865   |
| $I_{\text{thick}}$ (Å)  | 2.7618         | 2.8401  | 2.9283  | 3.0269  | 3.1371  | 3.2590  | 3.3291  | 3.3225  | 3.3916  | 3.5339   | 3.6828   | 3.8441   |
| $\psi$ (°)              | 57.30          | 57.22   | 57.13   | 57.08   | 57.00   | 56.98   | 56.93   | 57.16   | 56.92   | 56.85    | 56.82    | 56.76    |
| $\alpha_r$ (°)          | 14.24          | 13.68   | 13.05   | 12.40   | 11.76   | 11.17   | 10.85   | 11.07   | 10.59   | 9.97     | 9.19     | 8.30     |
| $\Delta z$ (Å)          | 0.0025         | 0.0038  | 0.0048  | 0.0065  | 0.0098  | 0.0100  | 0.0097  | 0.0134  | 0.0081  | 0.0075   | 0.0059   | 0.0007   |
| TQE                     |                |         |         |         |         |         |         |         |         |          |          |          |
|                         | T1             | 1.0020  | 1.0018  | 1.0018  | 1.0018  | 1.0017  | 1.0016  | 1.0015  | 1.0016  | 1.0015   | 1.0014   | 1.0014   |
|                         | T2             | 1.0022  | 1.0020  | 1.0019  | 1.0018  | 1.0017  | 1.0015  | 1.0015  | 1.0015  | 1.0015   | 1.0013   | 1.0012   |
|                         | T3             | 1.0014  | 1.0014  | 1.0014  | 1.0014  | 1.0013  | 1.0014  | 1.0015  | 1.0015  | 1.0015   | 1.0016   | 1.0018   |
|                         | T4             | 1.0014  | 1.0013  | 1.0013  | 1.0013  | 1.0012  | 1.0012  | 1.0012  | 1.0012  | 1.0012   | 1.0013   | 1.0015   |
|                         | mean           | 1.0018  | 1.0016  | 1.0016  | 1.0016  | 1.0015  | 1.0014  | 1.0014  | 1.0015  | 1.0014   | 1.0014   | 1.0016   |
| $V_T$ (Å <sup>3</sup> ) |                |         |         |         |         |         |         |         |         |          |          |          |
|                         | T1             | 2.1653  | 2.1832  | 2.2014  | 2.2182  | 2.2329  | 2.2465  | 2.2519  | 2.2520  | 2.2573   | 2.2667   | 2.2741   |
|                         | T2             | 2.1712  | 2.1937  | 2.2132  | 2.2280  | 2.2446  | 2.2597  | 2.2663  | 2.2655  | 2.2714   | 2.2832   | 2.2914   |
|                         | T3             | 2.1846  | 2.2010  | 2.2137  | 2.2279  | 2.2362  | 2.2471  | 2.2499  | 2.2510  | 2.2548   | 2.2607   | 2.2679   |
|                         | T4             | 2.6456  | 2.6701  | 2.6939  | 2.7169  | 2.7338  | 2.7492  | 2.7574  | 2.7572  | 2.7624   | 2.7748   | 2.7835   |
|                         | mean           | 2.2917  | 2.3120  | 2.3306  | 2.3478  | 2.3619  | 2.3756  | 2.3814  | 2.3814  | 2.3865   | 2.3964   | 2.4101   |
| TAV                     |                |         |         |         |         |         |         |         |         |          |          |          |
|                         | T1             | 8.7670  | 7.9201  | 7.7938  | 7.6536  | 7.2782  | 6.8914  | 6.4878  | 6.6689  | 6.3898   | 5.8480   | 5.7742   |
|                         | T2             | 9.3465  | 8.5208  | 7.9532  | 7.4991  | 7.0701  | 6.2889  | 6.1873  | 6.0815  | 5.9200   | 5.2435   | 4.8459   |
|                         | T3             | 5.6795  | 5.4856  | 5.4484  | 5.4292  | 5.1392  | 5.4588  | 5.6500  | 5.5193  | 5.5244   | 6.2617   | 7.1022   |
|                         | T4             | 5.3158  | 4.9999  | 4.9166  | 4.8963  | 4.6933  | 4.6968  | 4.6918  | 4.7291  | 4.7290   | 4.9050   | 5.8909   |
|                         | mean           | 7.2772  | 6.7316  | 6.5280  | 6.3696  | 6.0452  | 5.8340  | 5.7542  | 5.7497  | 5.6408   | 5.5646   | 5.9033   |
| OQE                     |                |         |         |         |         |         |         |         |         |          |          |          |
|                         | M1             | 1.0076  | 1.0078  | 1.0080  | 1.0083  | 1.0086  | 1.0090  | 1.0091  | 1.0091  | 1.0093   | 1.0096   | 1.0099   |
|                         | M2             | 1.0068  | 1.0069  | 1.0071  | 1.0076  | 1.0079  | 1.0083  | 1.0084  | 1.0084  | 1.0086   | 1.0089   | 1.0091   |
|                         | M3             | 1.0089  | 1.0089  | 1.0090  | 1.0092  | 1.0094  | 1.0096  | 1.0097  | 1.0097  | 1.0098   | 1.0101   | 1.0104   |
|                         | mean           | 1.0078  | 1.0079  | 1.0080  | 1.0084  | 1.0086  | 1.0090  | 1.0091  | 1.0091  | 1.0092   | 1.0095   | 1.0101   |
| $V_O$ (Å <sup>3</sup> ) |                |         |         |         |         |         |         |         |         |          |          |          |
|                         | M1             | 10.9819 | 11.1613 | 11.3275 | 11.4712 | 11.6131 | 11.7332 | 11.7963 | 11.7940 | 11.8434  | 11.9414  | 12.0272  |
|                         | M2             | 11.0249 | 11.1943 | 11.3509 | 11.4878 | 11.6276 | 11.7373 | 11.8073 | 11.8017 | 11.8504  | 11.9562  | 12.0489  |
|                         | M3             | 10.9384 | 11.1177 | 11.2841 | 11.4389 | 11.5779 | 11.6996 | 11.7608 | 11.7593 | 11.8076  | 11.9014  | 11.9876  |
|                         | mean           | 10.9817 | 11.1578 | 11.3208 | 11.4660 | 11.6062 | 11.7234 | 11.7881 | 11.7850 | 11.8338  | 11.9330  | 12.0212  |
| OAV                     |                |         |         |         |         |         |         |         |         |          |          |          |
|                         | M1             | 24.7226 | 25.1851 | 25.8170 | 26.7405 | 27.5401 | 28.5645 | 28.9297 | 28.9985 | 29.4432  | 30.2918  | 31.1641  |
|                         | M2             | 22.6128 | 23.1668 | 23.8637 | 25.2275 | 26.1522 | 27.4350 | 27.8962 | 27.9614 | 28.4783  | 29.2945  | 30.0863  |
|                         | M3             | 29.2789 | 29.2291 | 29.5374 | 29.9321 | 30.2862 | 30.8173 | 31.0595 | 31.0242 | 31.3262  | 32.1278  | 32.9727  |

---

|      |         |         |         |         |         |         |         |         |         |         |         |         |
|------|---------|---------|---------|---------|---------|---------|---------|---------|---------|---------|---------|---------|
| mean | 25.5381 | 25.8603 | 26.4060 | 27.3000 | 27.9928 | 28.9389 | 29.2951 | 29.3280 | 29.7492 | 30.5714 | 31.4077 | 32.4412 |
|------|---------|---------|---------|---------|---------|---------|---------|---------|---------|---------|---------|---------|

---

25  $T_{\text{thick}}$ ,  $M_{\text{thick}}$ , and  $I_{\text{thick}}$  are tetrahedral sheet thickness (calculated from the  $z$  coordinates of the basal and apical oxygen atoms), the octahedral sheet thickness (calculated from the  $z$  coordinates of the apical and hydroxyl O atoms) and interlayer thickness (calculated from the  $z$  coordinates of the basal oxygen atoms), respectively.  $\psi$  and  $\alpha$  are the octahedral flattening angle and the tetrahedral rotation angle, respectively (Donnay et al., 1964a, b; Hazen and Burnham, 1973).  $\Delta z$  is the departure from coplanarity of the basal oxygen atoms O(b) (Güven, 1971). TQE and OQE are the tetrahedral and octahedral quadratic elongations, respectively, whereas TAV and OAV are the tetrahedral and octahedral bond angle variance, respectively (Robinson et al., 1971).  $V_T$  and  $V_O$  are the volumes of tetrahedra and octahedra, respectively. T and M represent the generic tetrahedral and octahedral sites, respectively. The results of the equilibrium geometry (0 GPa) were reported in italic font.

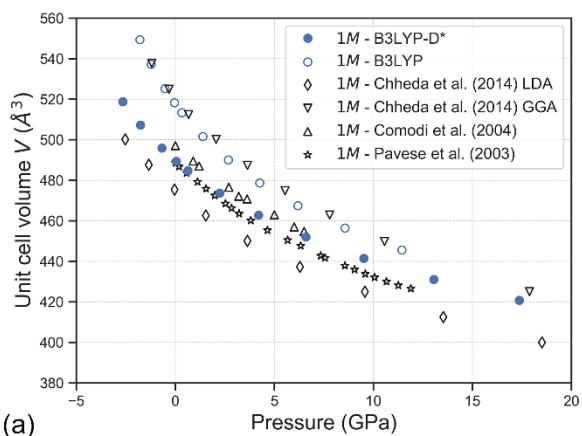

(a)

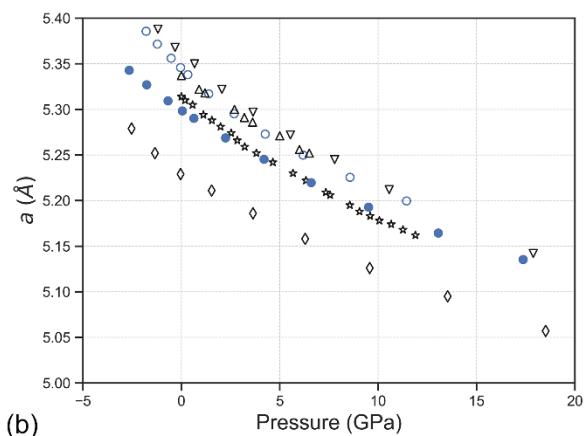

(b)

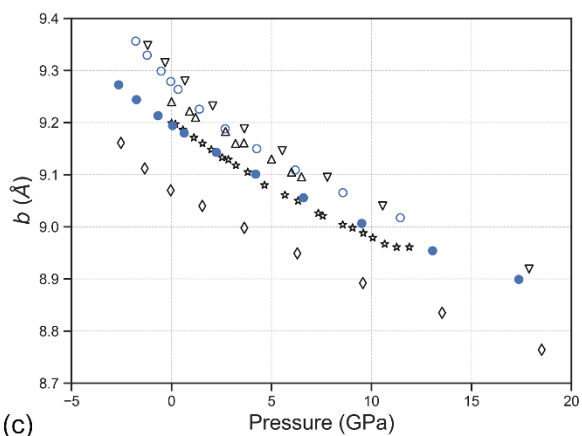

(c)

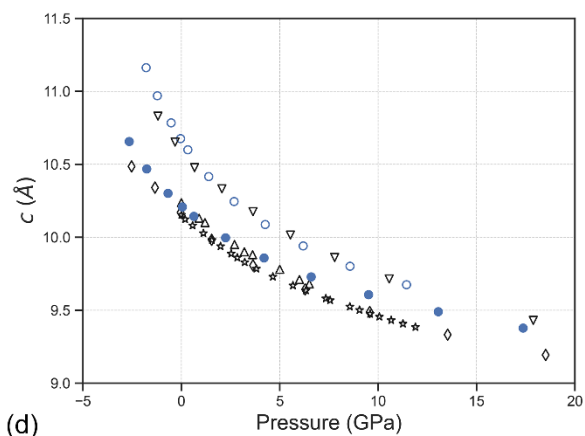

(d)

30

**Figure S1. Absolute variation of (a) unit cell volume  $V$ , (b)  $a$ , (c)  $b$  and (d)  $c$  of the 1M polytype of phlogopite as a function of pressure. The experimental data of Pavese et al. (2003) and Comodi et al. (2004), and the theoretical ones from Chheda et al. (2014) are reported for a comparison.**

35

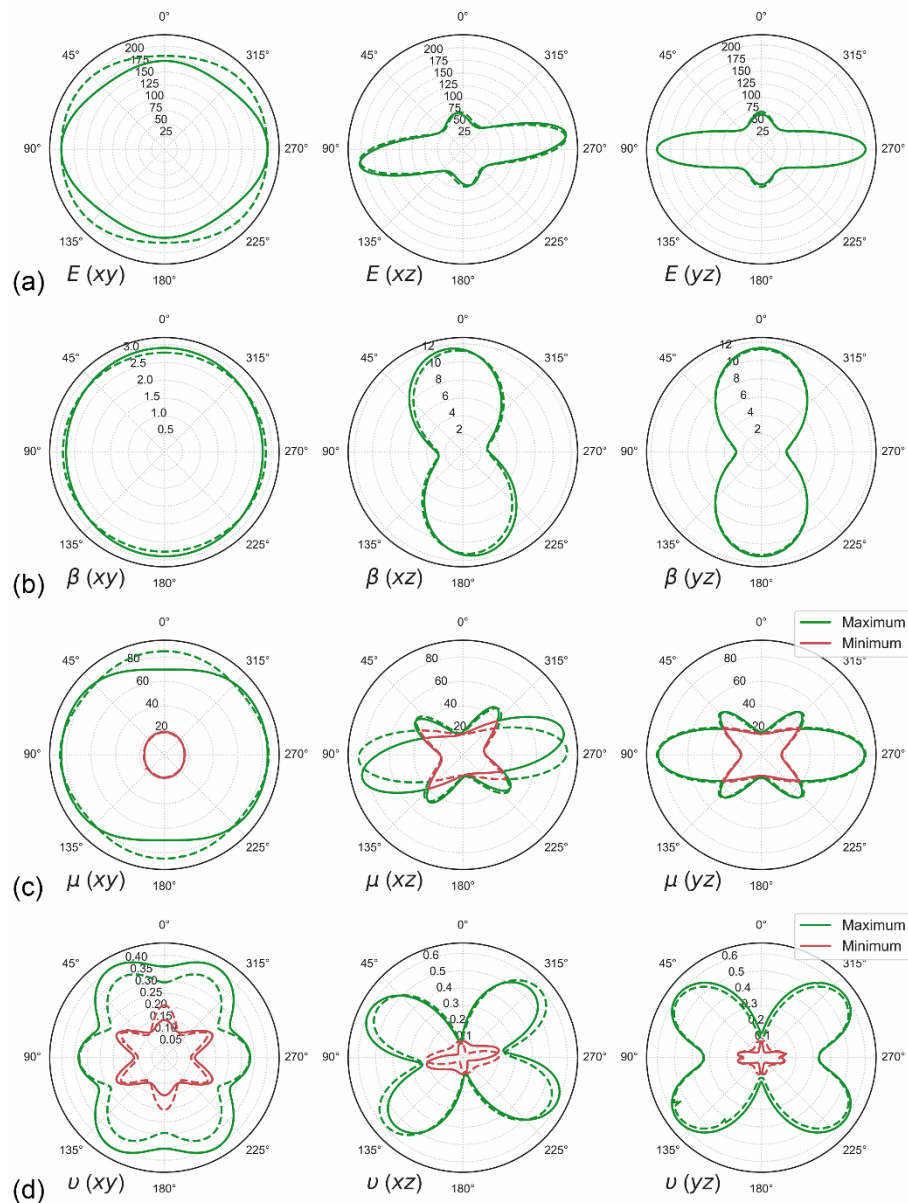

**Figure S2.** (a) Young's modulus (GPa), (b) linear compressibility ( $\text{TPa}^{-1}$ ), (c) shear modulus (GPa) and (d) Poisson's ratio (dimensionless) of phlogopite-1M (solid lines) and phlogopite-2M1 (dashed lines), as obtained from DFT/B3LYP-D\* calculations. Each panel reports the directional variation of the elastic property calculated on the  $xy$ ,  $xz$  and  $yz$  Cartesian planes.
